# Supplementary material for: The Influence of Graphene Oxide Composition on Properties of Surface-Modified Metal Electrodes
Source: MDPI journal article supplement (doi:10.3390/ma15217684), 2022-11-01
Supplement: s1 [file s1]

## Supplementary data

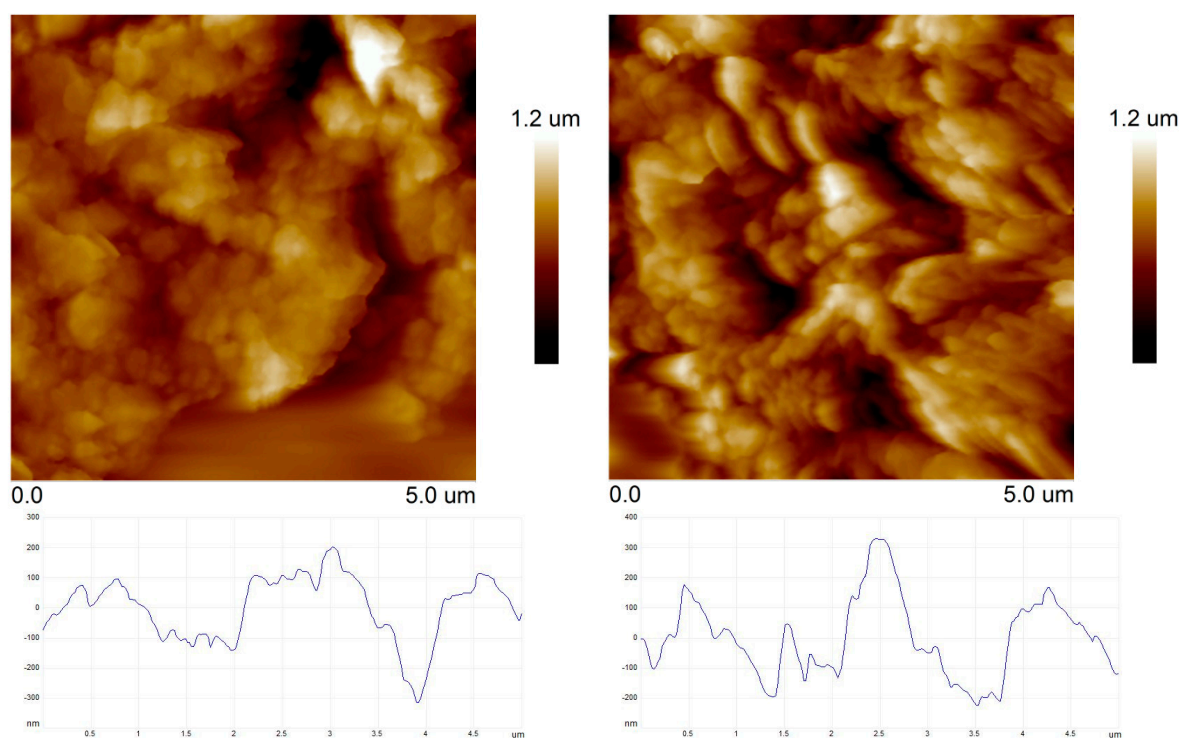

Fig. S1 2D AFM images and profiles of gold electrodes modified with graphene oxides: GO I (left) and GO II (right) suspensions in concentration of  $20 \text{ g L}^{-1}$

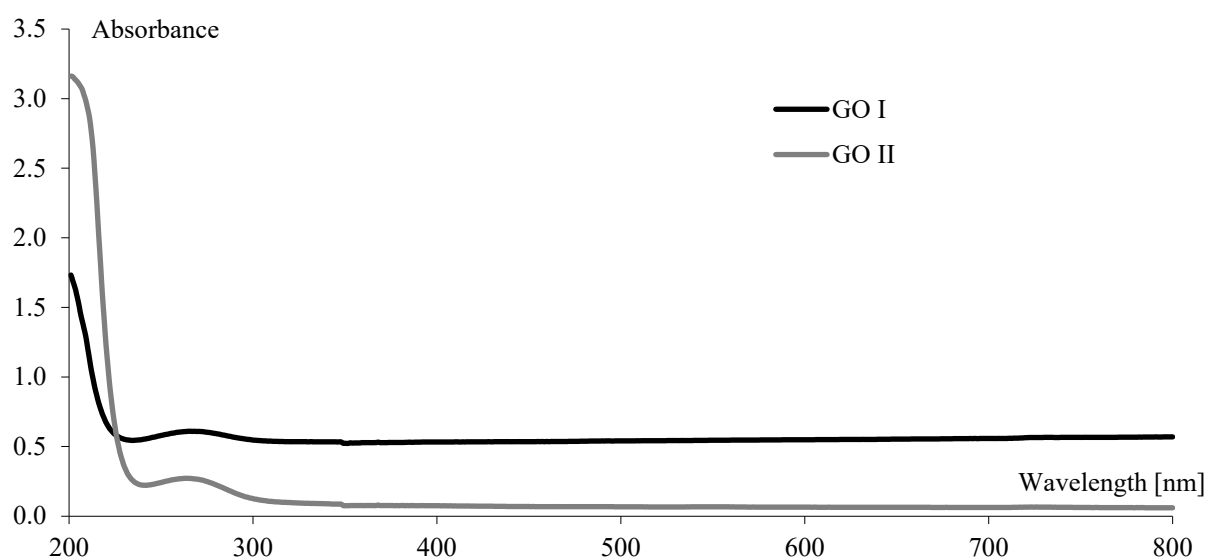

Fig. S2 UV-Vis spectra of GO I and GO II aqueous suspensions

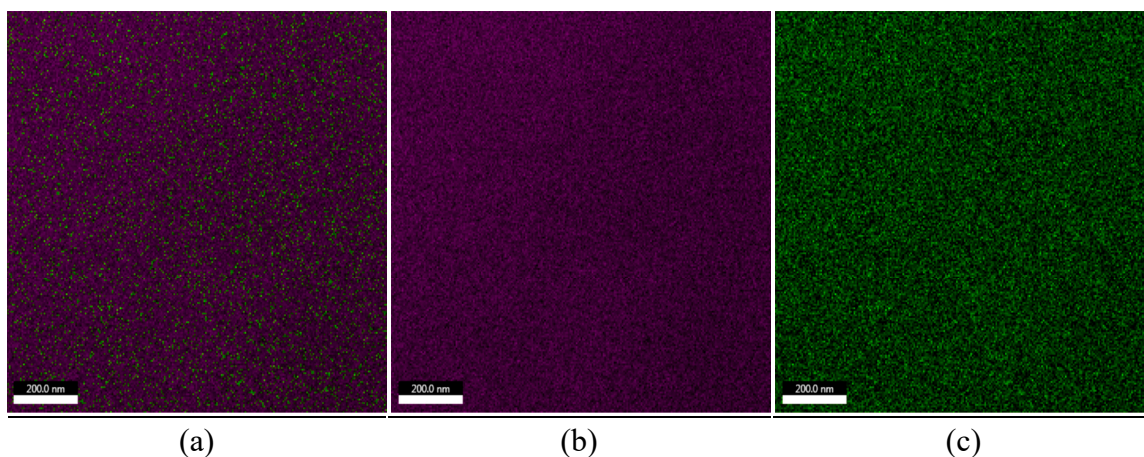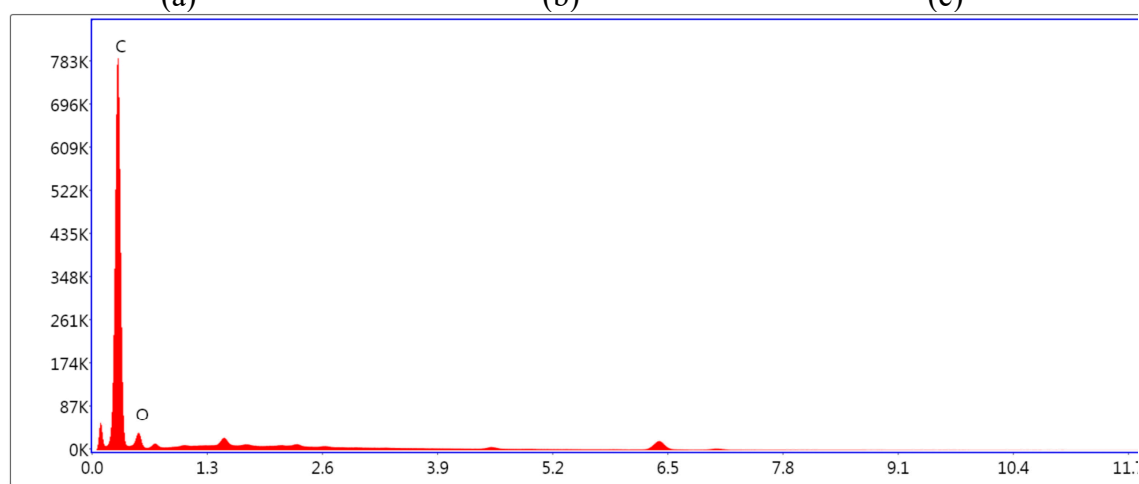

Lsec: 1927.8 0 Cnts 0.000 keV Det: Octane Super Det

Fig. S3. The quantitative EDS element mapping of GO I (a); carbon C K (b); oxygen O K (c) and EDS spectrum (d).

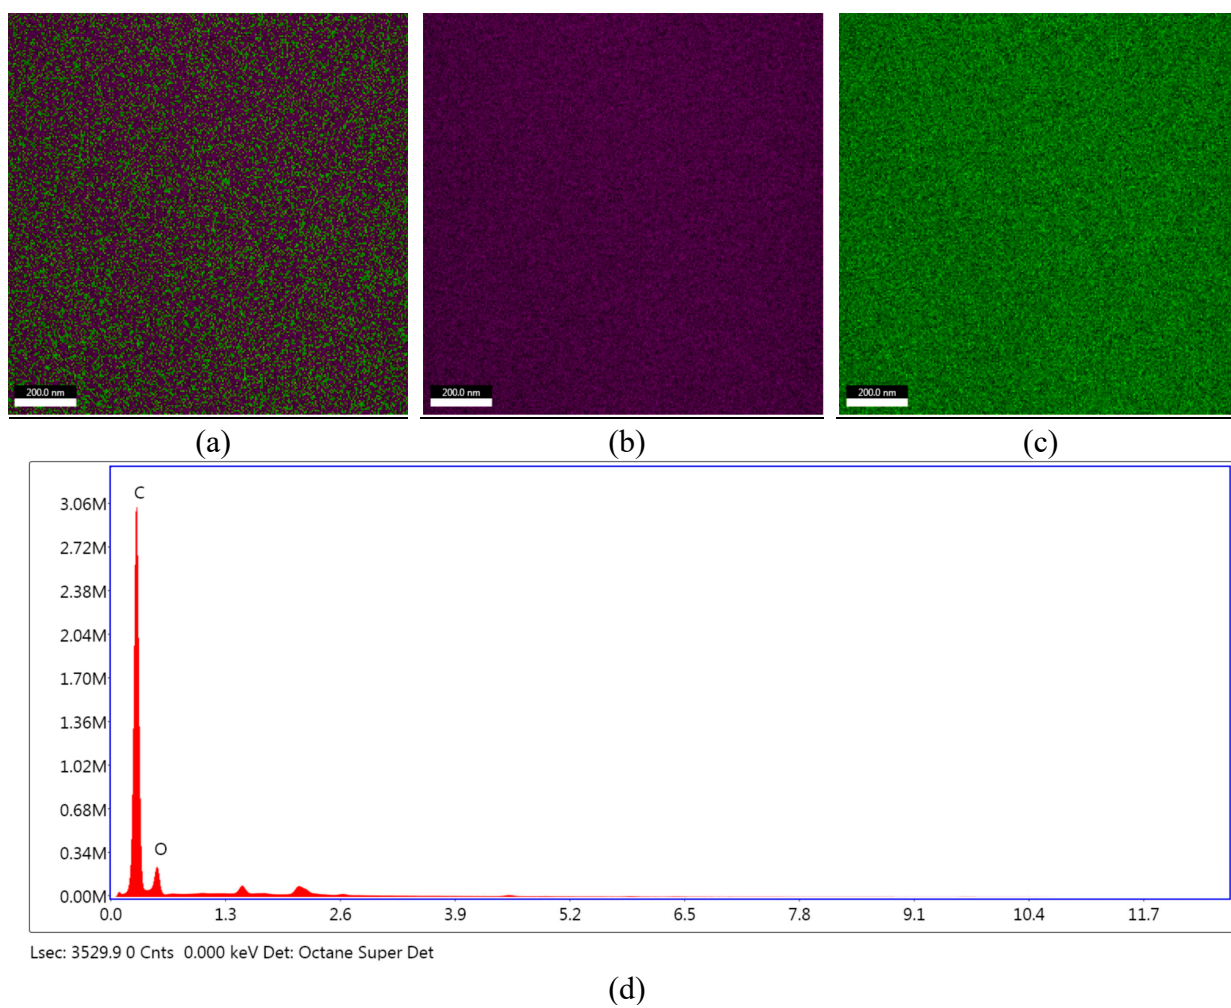

Fig. S4. The quantitative EDS element mapping of GO II (a); carbon C K (b); oxygen O K (c) and EDS spectrum (d).
